# Supplementary material for: Effect of precursor on the catalytic properties of Ni2P/SiO2 in methyl palmitate hydrodeoxygenation
Source: Royal Society of Chemistry journal article supplement (doi:10.1039/c6ra01171c), 2016-01-01
Supplement: c6ra01171c1.pdf [file c6ra01171c1.pdf]

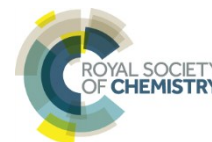

## Supporting information

### Effect of precursor on the catalytic properties of Ni<sub>2</sub>P/SiO<sub>2</sub> in methyl palmitate hydrodeoxygenation

Ivan V. Shamanaev,<sup>abc</sup> Irina V. Deliy,<sup>abc\*</sup> Pavel V. Aleksandrov,<sup>ac</sup> Evgeny Yu. Gerasimov,<sup>abc</sup> Vera P. Pakharukova<sup>abc</sup>,  
Evgeny G. Kodenev,<sup>a</sup> Artem B. Ayupov,<sup>ab</sup> Andrey S. Andreev,<sup>a</sup> Olga B. Lapina,<sup>a</sup> and Galina A. Bukhtiyarova<sup>a</sup>

<sup>a</sup>Boreskov Institute of Catalysis, pr. Lavrentieva 5, Novosibirsk, 630090, Russia.

<sup>b</sup>Novosibirsk State University, Pirogova st. 2, Novosibirsk, 630090, Russia.

<sup>c</sup>Research and Educational Center for Energy Efficient Catalysis, Novosibirsk National Research University, Pirogova st. 2, Novosibirsk, 630090, Russia.

E-mail: [delij@catalysis.ru](mailto:delij@catalysis.ru)

#### 1. FID relative sensitivities

Relative sensitivities of methyl palmitate and HDO products are listed in Table S1.

**Table S1** Relative sensitivities for hydrogen flame detector according to W. A. Dietz.<sup>1</sup>

| Compound              | Composition                                                        | Relative Sensitivity |
|-----------------------|--------------------------------------------------------------------|----------------------|
| methyl palmitate      | C <sub>15</sub> H <sub>31</sub> COOCH <sub>3</sub>                 | 0.78                 |
| palmitic acid         | C <sub>15</sub> H <sub>31</sub> COOH                               | 0.65                 |
| palmityl palmitate    | C <sub>15</sub> H <sub>31</sub> COOC <sub>16</sub> H <sub>33</sub> | 0.30                 |
| Hexadecanal           | C <sub>15</sub> H <sub>31</sub> CHO                                | 0.78                 |
| hexadecan-1-ol        | C <sub>16</sub> H <sub>33</sub> OH-1                               | 0.85                 |
| hexadecan-2-ol        | C <sub>16</sub> H <sub>33</sub> OH-2                               | 0.85                 |
| pentadecene           | C <sub>15</sub> H <sub>30</sub>                                    | 1.03                 |
| hexadecene            | C <sub>16</sub> H <sub>32</sub>                                    | 1.02                 |
| <i>n</i> -pentadecane | C <sub>15</sub> H <sub>32</sub>                                    | 0.97                 |
| <i>n</i> -hexadecane  | C <sub>16</sub> H <sub>34</sub>                                    | 0.98                 |
| methane               | CH <sub>4</sub>                                                    | 0.97                 |
| methanol              | CH <sub>3</sub> OH                                                 | 0.23                 |

## 2. Weisz-Prater calculations

Table S2 Physical properties of reagents for Weisz-Prater calculations

| Designation            | Description                                                            | Value                                         | Reference                                                     |
|------------------------|------------------------------------------------------------------------|-----------------------------------------------|---------------------------------------------------------------|
| $T$                    | System temperature                                                     | 563 K                                         |                                                               |
| $P_{H_2}$              | Hydrogen pressure                                                      | 3.0 MPa                                       |                                                               |
| $R_{particles}$        | Catalyst particles radius                                              | 0.5 mm                                        |                                                               |
| $r_{pore}$             | Catalyst pore radius                                                   | 12.7 nm                                       |                                                               |
| $C_{S H_2}$            | Surface concentration of hydrogen                                      | $2.24 \cdot 10^{-4}$ mol/cm <sup>3</sup>      | 2                                                             |
| $C_{S MP}$             | Surface concentration of methyl palmitate                              | $2.77 \cdot 10^{-4}$ mol/cm <sup>3</sup>      |                                                               |
| $A_{MP}$               | Observed HDO rate                                                      | $2.74 \cdot 10^{-6}$ mol/(s·cm <sup>3</sup> ) |                                                               |
| $r_{H_2}$              | Radius of hydrogen molecule                                            | 0.120 nm                                      |                                                               |
| $r_{MP}$               | Radius of methyl palmitate molecule                                    | 0.395 nm                                      |                                                               |
| $\lambda_{MP}$         | $r_{MP}/r_{pore}$                                                      | 0.0311                                        |                                                               |
| $\lambda_{H_2}$        | $r_{H_2}/r_{pore}$                                                     | 0.0095                                        |                                                               |
| $P$                    | Fitting parameter for silica                                           | 16.3                                          |                                                               |
| $X$                    | <i>n</i> -Dodecane association parameter                               | 1                                             |                                                               |
| $M_{Dodecane}$         | Molecular weight of <i>n</i> -dodecane                                 | 170.34 g/mol                                  |                                                               |
| $\eta_{Dodecane}$      | Viscosity of <i>n</i> -dodecane                                        | 0.25 mPa·s                                    |                                                               |
| $V_{H_2}$              | Molar volume of hydrogen at normal boiling point                       | 0.0286 m <sup>3</sup> /kmol                   |                                                               |
| $V_{MP}$               | Molar volume of methyl palmitate at normal boiling point               | 0.4357 m <sup>3</sup> /kmol                   | calculated according to the method, described in <sup>3</sup> |
| $V_{Dodecane}$         | Molar volume of <i>n</i> -dodecane at normal boiling point             | 0.2872 m <sup>3</sup> /kmol                   | calculated according to the method, described in <sup>3</sup> |
| $L_{MP}^{vap}$         | Enthalpy of vaporization of methyl palmitate at normal boiling point   | 96.8 kJ/mole                                  | 4                                                             |
| $L_{Dodecane}^{vap}$   | Enthalpy of vaporization of <i>n</i> -dodecane at normal boiling point | 61.51 kJ/mol                                  | 5                                                             |
| $D_{H_2 Dodecane}$     | Diffusion coefficient of hydrogen in <i>n</i> -dodecane                | $2.91 \cdot 10^{-4}$ cm <sup>2</sup> /s       |                                                               |
| $D_{MP Dodecane}$      | Diffusion coefficient of methyl palmitate in <i>n</i> -dodecane        | $7.37 \cdot 10^{-5}$ cm <sup>2</sup> /s       |                                                               |
| $D_{eff H_2 Dodecane}$ | Effective diffusion coefficient of hydrogen                            | $2.47 \cdot 10^{-4}$ cm <sup>2</sup> /s       |                                                               |
| $D_{eff MP Dodecane}$  | Effective diffusion coefficient of methyl palmitate                    | $4.59 \cdot 10^{-5}$ cm <sup>2</sup> /s       |                                                               |
| $N_{W-P H_2}$          | Weisz-Prater number for hydrogen                                       | 0.017                                         |                                                               |
| $N_{W-P MP}$           | Weisz-Prater number for methyl palmitate                               | 0.076                                         |                                                               |

## References

- 1 W. A. Dietz, *J. Gas Chromatogr.*, 1967, **5**, 68–71.
- 2 W. Gao, R. L. Robinson and K. A. M. Gasem, *J. Chem. Eng. Data*, 1999, **44**, 130–132.
- 3 W. Schotte, *Chem. Eng. J.*, 1992, **48**, 167–172.
- 4 J. S. Chickos, H. Zhao and G. Nichols, *Thermochim. Acta*, 2004, **424**, 111–121.
- 5 J. S. Chickos and J. A. Wilson, *J. Chem. Eng. Data*, 1997, **42**, 190–197.

### 3. H<sub>2</sub>-TPR of passivated NiP\_Ah sample

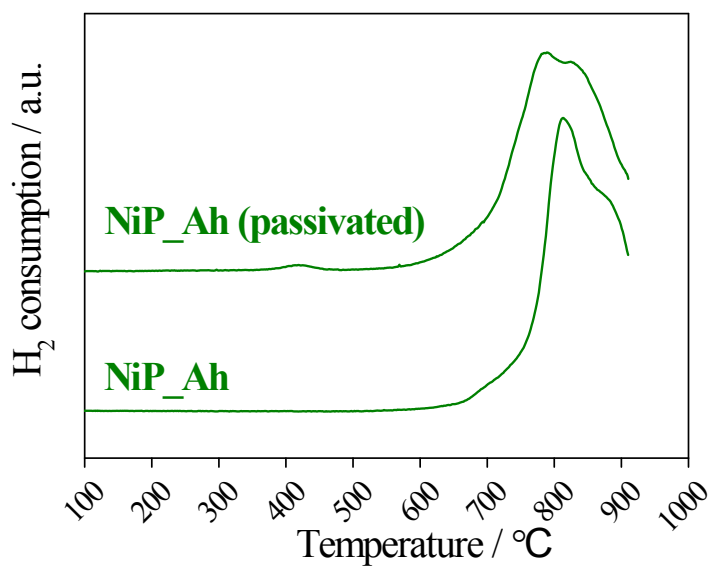

Fig. S1 H<sub>2</sub>-TPR curves of calcined NiP\_Ah precursor and NiP\_Ah sample after reduction at 600 °C and subsequent passivation

4.  $C_{16}/C_{15}$  molar ratio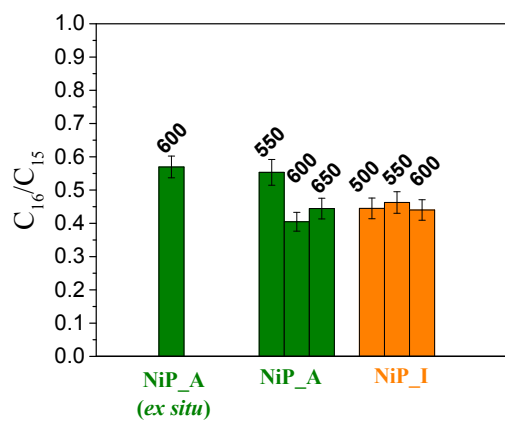

**Fig. S2**  $C_{16}/C_{15}$  ratio of NiP\_A samples reduced *ex situ* at 600 °C, *in situ* at 500, 550 or 600 °C and NiP\_I samples reduced *in situ* at 500, 550 and 600 °C. WHSV = 48 h<sup>-1</sup>, reaction temperature = 290 °C, reaction pressure = 3.0 MPa

**5. Methyl palmitate and oxygen-containing compounds conversions over NiP\_A catalyst**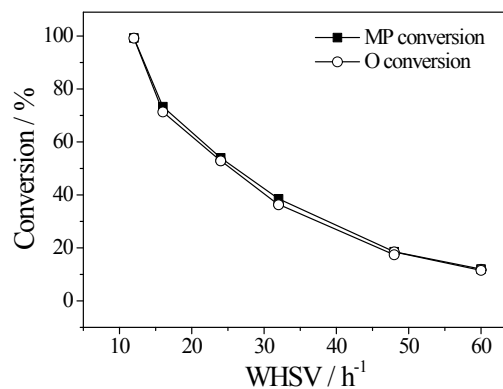

**Fig. S3** Methyl palmitate and oxygen-containing compounds conversions during methyl palmitate HDO over NiP\_A catalyst at a temperature of 270 °C and pressure 3.0 MPa
